# Supplementary material
Source: PubMed Central journal article supplement (PMC6214667)
Supplement: NIHMS1503655-supplement-permission_for_visual_abstract.pdf [file NIHMS1503655-supplement-permission_for_visual_abstract.pdf]

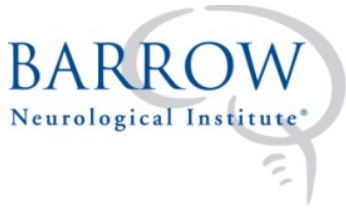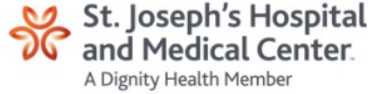

Barrow Neurological Institute holds the copyright to IM# 019623-01 to be used in the manuscript by Yoshinobu Kamio MD, Takeshi Miyamoto MD PhD, Tetsuro Kimura MD PhD, Kazuha Mitsui MD, Hajime Furukawa MD; Dingding Zhang MD PhD, Kimihiko Yokosuka MD PhD, Masaaki Korai MD PhD, Daisuke Kudo MD PhD, Ronald J. Lukas PhD, Michael T. Lawton MD and Tomoki Hashimoto, MD entitled **“Roles of Nicotine in the Development of Intracranial Aneurysm Rupture”** for possible publication in *Stroke*. Permission is granted for print publication and for corresponding electronic publication of the manuscript and for all compilations that include this manuscript in its original form. Permission is granted with distribution rights in all languages throughout the world. The permission is subject to the use of a standard credit line on the same page where our figures will appear. Permission is also granted to use the figures for the Journal cover or for promotion of the issue or Journal.

**“Used with permission from Barrow Neurological Institute, Phoenix, Arizona.”**

**PLEASE NOTE:** Permission to use this material in other forms and for other uses requires a separate permission request. Permission to distribute or sell the figures independent of the original manuscript and corresponding electronic publication of the manuscript requires a separate permission request. When submitting a request for other uses, please return a copy of this approved permission request to use this material together with the name, anticipated publication date, and tentative price of the other format.

**Cassie Todd, Production Editor**  
 Neuroscience Publications  
 Barrow Neurological Institute

Date: 6/19/2018

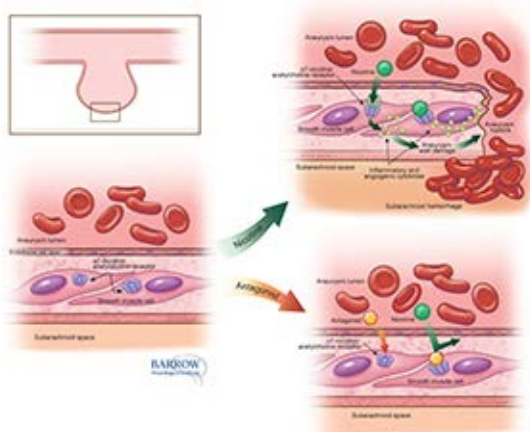

019623-01
