# Supplementary material
Source: PubMed Central journal article supplement (PMC6214667)
Supplement: NIHMS1503655-supplement-Visual_Abstract.pdf [file NIHMS1503655-supplement-Visual_Abstract.pdf]

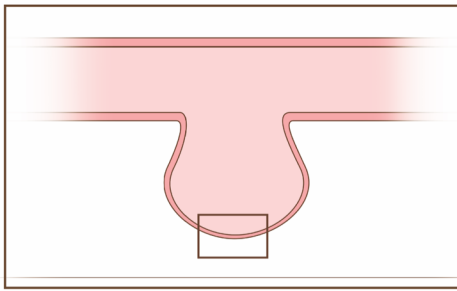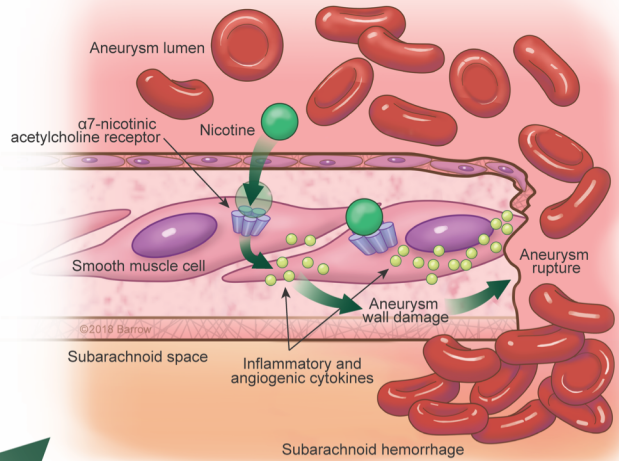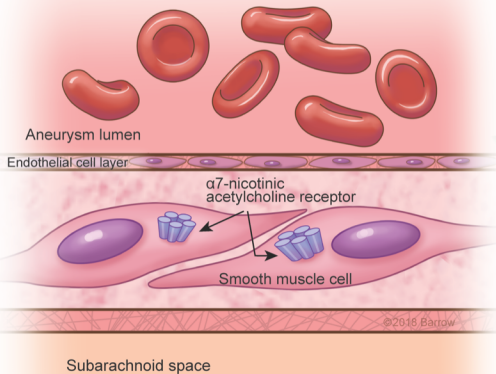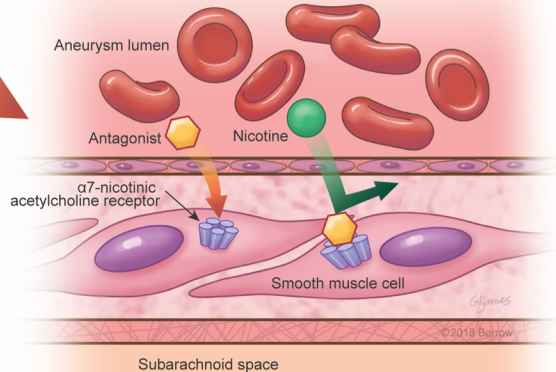

**BARROW**  
Neurological Institute

Using a mouse model of intracranial aneurysm, we have shown that nicotine exposure increases aneurysmal rupture through  $\alpha 7$ -nicotinic acetylcholine receptors on vascular smooth muscle cells. Activation of  $\alpha 7$ -nicotinic acetylcholine receptor leads to sustained angiogenesis and inflammation that promote aneurysmal rupture.  $\alpha 7$ -nicotinic acetylcholine receptor may serve as a potential therapeutic target for the prevention of intracranial aneurysmal rupture. (Figure is used with permission from Barrow Neurological Institute, Phoenix, Arizona. )
